# Supplementary material for: Elevated low-density lipoprotein cholesterol levels and prostate cancer risk: UK Biobank evidence
Source: World J Urol. 2026 Feb 27;44(1):210. doi: 10.1007/s00345-026-06313-4 (PMC12948794; doi:10.1007/s00345-026-06313-4)
Supplement: Supplementary file 1 — Supplementary Material 1 [file 345_2026_6313_MOESM1_ESM.xlsx]

## Sheet: Tabele_1
		Cohort 1 Count	%	Cohort 4 Count	%	Chi2 Statistic	Chi2 P-Value
	Groups
BMI*
	Underweight	485	0.239059	11	0.116947	22.0111	<0,01
	Healthy Weight	50508	24.8956	2328	24.7502
	Overweight	99890	49.2362	4922	52.3283
	Obesity	51996	25.6291	2145	22.8046
Age at assesment (years)
	40-49	51594	25.2421	443	4.68585	11.4402	>0,01
	50-59	67191	32.8728	2479	26.2217
	60-69	84642	41.4106	6441	68.1299
	70-79	970	0.474567	91	0.962556
Health index**
	Excellent	32135	15.754	1507	15.9724	39.179	>0,01
	Good	114066	55.9202	5523	58.5374
	Fair	46270	22.6836	2042	21.6428
	Poor	10428	5.11227	332	3.51881
	Prefer not to answer	167	0.0818708	3	0.0317965
	Do not know	914	0.448083	28	0.296767
Ethnicity
	White	191490	93.8727	9013	95.5273	528.999	<0,01
	Black	3032	1.48635	196	2.07737
	Asian	5608	2.74917	104	1.10228
	Mixed	1018	0.499047	31	0.328564
	Other ethnic group	1852	0.907892	52	0.551139
	Prefer not to answer	845	0.414238	32	0.339163
	Do not know	100	0.0490223	6	0.063593
Father with prostate cancer
	No	185329	93.4801	8269	89.8609	0.910564	>0,01
	Yes	12926	6.51989	933	10.1391
Mother with breast cancer
	No	190564	95.2011	8776	94.5384	0.96204	>0,01
	Yes	9606	4.79892	507	5.4616
Table 1. Descriptive statistics of study population cohort 1 (control group) and cohort 4 (men who developed PCa after inclusion)
Elevated low-density lipoprotein cholesterol levels and prostate cancer risk: UK Biobank evidence
World Journal of Urology
Author names: R. Alexa, J. Kranz, M. Thöne, S. Grundl, M. Hoffmann, P. H. Koop, C. Feng, K.M. Schneider & C. Schneider & M. Saar
Corresponding Author - Radu Alexa: Department of Urology and Pediatric Urology, University Hospital, RWTH Aachen University, Germany; ralexa@ukaachen.de
