# Supplementary material for: Elevated low-density lipoprotein cholesterol levels and prostate cancer risk: UK Biobank evidence
Source: World J Urol. 2026 Feb 27;44(1):210. doi: 10.1007/s00345-026-06313-4 (PMC12948794; doi:10.1007/s00345-026-06313-4)
Supplement: Supplementary file 2 — Supplementary Material 2 [file 345_2026_6313_MOESM2_ESM.xlsx]

## Sheet: Table 2
	Cohort 1*	Cohort 4*	Mean Cohort 1	Median Cohort 1	Q1 Cohort 1	Q3 Cohort 1	Mean Cohort 4	Median Cohort 4	Q1 Cohort 4	Q3 Cohort 4	KS** Statistic	KS P-Value
Alanine aminotransferase (U/L)	191587	8844	27.6399	24.01	18.54	32.21	25.7476	22.85	17.99	29.81	0.0586813	<0,01
Apolipoprotein A	176760	8180	1.42597	1.404	1.267	1.558	1.44591	1.418	1.282	1.579	0.0358487	<0,01
Apolipoprotein B	190401	8811	1.02786	1.016	0.859	1.181	1.01498	1.001	0.852	1.165	0.0276445	<0,01
Aspartate aminotransferase	190951	8821	28.2889	26.2	22.6	31	27.5222	25.8	22.4	30.2	0.034378	<0,01
Cholesterol	191759	8849	5.4877	5.46	4.715	6.222	5.43289	5.406	4.666	6.156	0.023553	<0,01
Gamma glutamyltransferase	191639	8842	45.8182	33.2	23.7	50.4	43.0836	32.5	23.6	48.8	0.0208811	<0,01
LDL direct	191345	8823	3.48309	3.463	2.877	4.053	3.43359	3.407	2.837	3.988	0.0274543	<0,01
Triglycerides	191552	8834	1.98213	1.694	1.178	2.455	1.8989	1.66	1.177	2.359	0.0296162	<0,01
Albumin	177120	8198	45.5675	45.56	43.86	47.27	45.2132	45.21	43.54	46.89	0.0610279	<0,01
Alkaline phosphatase	191754	8846	81.9692	78.9	67.1	93	81.5031	78.3	66.7	92.1	0.014579	>0,01
Table 2. Kolmogorov-Smirnov Test for comparing hepatic function between cohort 1 (control group) and cohort 4 (men who developed PCa after inclusion); *number of patients with a documented value; ** Kolmogorov-Smirnov
Elevated low-density lipoprotein cholesterol levels and prostate cancer risk: UK Biobank evidence
World Journal of Urology
Author names: R. Alexa, J. Kranz, M. Thöne, S. Grundl, M. Hoffmann, P. H. Koop, C. Feng, K.M. Schneider & C. Schneider & M. Saar
Corresponding Author - Radu Alexa: Department of Urology and Pediatric Urology, University Hospital, RWTH Aachen University, Germany; ralexa@ukaachen.de
