# Supplementary material for: Elevated low-density lipoprotein cholesterol levels and prostate cancer risk: UK Biobank evidence
Source: World J Urol. 2026 Feb 27;44(1):210. doi: 10.1007/s00345-026-06313-4 (PMC12948794; doi:10.1007/s00345-026-06313-4)
Supplement: Supplementary file 4 — Supplementary Material 4 [file 345_2026_6313_MOESM4_ESM.xlsx]

## Sheet: Table 3
		Cohort 1 Count	%	Cohort 4 Count	%	Chi2 Statistic	Chi2 P-Value
	Groups
BMI*
	Underweight	119	0.253272	10	0.106417	4.5669	>0,01
	Healthy Weight	11670	24.8377	2327	24.7632
	Overweight	24357	51.8399	4918	52.3359
	Obesity	10839	23.0691	2142	22.7945
Age at assesment (years)
	40-49	1636	3.48196	335	3.56497	5.14394	>0,01
	50-59	10653	22.6732	2124	22.603
	60-69	31490	67.0214	6297	67.0107
	70-79	3206	6.82345	641	6.82133
Health index**
	Excellent	7274	15.4819	1503	15.9945	17.9091	>0,01
	Good	26829	57.1024	5507	58.6038
	Fair	10322	21.9692	2032	21.6239
	Poor	2344	4.98893	325	3.45855
	Prefer not to answer	22	0.0468245	2	0.0212834
	Do not know	193	0.410778	28	0.297967
Ethnicity
	White	44871	95.5007	8983	95.5943	445.665	<0,01
	Black	517	1.10035	194	2.06449
	Asian	1024	2.17942	100	1.06417
	Mixed	138	0.293711	31	0.329893
	Other ethnic group	232	0.493775	52	0.553368
	Prefer not to answer	183	0.389486	30	0.319251
	Do not know	18	0.0383101	6	0.0638502
Father with prostate cancer
	No	42855	93.7623	8235	89.8527	0.0868689	>0,01
	Yes	2851	6.23769	930	10.1473
Mother with breast cancer
	No	43946	95.2573	8743	94.5598	0.025491	>0,01
	Yes	2188	4.74271	503	5.44019
Table 3. Descriptive statistics of study population cohort 1 (control group) and cohort 4 (men who developed PCa after inclusion) after matching 5:1 based on age, ethnicity and BMI
Elevated low-density lipoprotein cholesterol levels and prostate cancer risk: UK Biobank evidence
World Journal of Urology
Author names: R. Alexa, J. Kranz, M. Thöne, S. Grundl, M. Hoffmann, P. H. Koop, C. Feng, K.M. Schneider & C. Schneider & M. Saar
Corresponding Author - Radu Alexa: Department of Urology and Pediatric Urology, University Hospital, RWTH Aachen University, Germany; ralexa@ukaachen.de
