# Supplementary material for: Elevated low-density lipoprotein cholesterol levels and prostate cancer risk: UK Biobank evidence
Source: World J Urol. 2026 Feb 27;44(1):210. doi: 10.1007/s00345-026-06313-4 (PMC12948794; doi:10.1007/s00345-026-06313-4)
Supplement: Supplementary file 5 — Supplementary Material 5 [file 345_2026_6313_MOESM5_ESM.xlsx]

## Sheet: Table 4
	Cohort 1a*	Cohort 4a*	Mean Cohort 1a	Median Cohort 1a	Q1 Cohort 1a	Q3 Cohort 1a	Mean Cohort 4a	Median Cohort 4a	Q1 Cohort 4a	Q3 Cohort 4a	KS** Statistic	KS** P-Value
Alanine aminotransferase	44173	8812	25.9606	22.88	17.96	30.11	25.7441	22.86	17.99	29.8025	0.0103798	0.40446
Apolipoprotein A	40675	8149	1.44193	1.42	1.278	1.577	1.44623	1.419	1.282	1.579	0.0128476	0.210597
Apolipoprotein B	43955	8779	1.01199	1.002	0.841	1.166	1.01545	1.001	0.852	1.166	0.0175258	0.0220692
Aspartate aminotransferase	44041	8789	27.8855	26	22.5	30.6	27.5219	25.8	22.4	30.2	0.0156553	0.0545338
Cholesterol	44212	8817	5.40567	5.389	4.595	6.163	5.43554	5.409	4.668	6.158	0.0244671	0.000295967
Gamma glutamyltransferase	44191	8810	44.9137	32.7	23.7	48.9	43.0759	32.5	23.6	48.8	0.0101919	0.427465
LDL direct	44125	8791	3.41173	3.395	2.77	4	3.43549	3.408	2.8375	3.991	0.0255737	0.000134475
Triglycerides	44171	8802	1.93086	1.667	1.1695	2.38	1.89898	1.659	1.177	2.35975	0.0121926	0.223488
Albumin	40765	8167	45.183	45.18	43.49	46.86	45.216	45.21	43.54	46.89	0.0107162	0.412416
Alkaline phosphatase	44213	8814	82.4484	79.1	67.2	93.5	81.478	78.3	66.7	92.1	0.0219844	0.00161921
Table 4. Kolmogorov-Smirnov Test for comparing hepatic function between cohort 1 (control group) and cohort 4 (men who developed PCa after inclusion) after matching 5:1 based on age, ethnicity and BMI; *number of patients with a documented value; ** Kolmogorov-Smirnov
Elevated low-density lipoprotein cholesterol levels and prostate cancer risk: UK Biobank evidence
World Journal of Urology
Author names: R. Alexa, J. Kranz, M. Thöne, S. Grundl, M. Hoffmann, P. H. Koop, C. Feng, K.M. Schneider & C. Schneider & M. Saar
Corresponding Author - Radu Alexa: Department of Urology and Pediatric Urology, University Hospital, RWTH Aachen University, Germany; ralexa@ukaachen.de
